# Supplementary material
Source: publisher figshare collection journal article supplement (https://acs.figshare.com/ndownloader/files/3763642)
Supplement: Supplementary file 1 [file 3763642]

**Novel Nrf2/ARE Activator, *trans*-Coniferylaldehyde, Induces a HO-1-Mediated Defense Mechanism through a Dual p38 $\alpha$ /MAPKAPK-2 and PK-N3 Signaling Pathway**

Huang-Hui Chen<sup>a, b</sup>, Tai-Chi Wang<sup>c</sup>, Yen-Chen Lee<sup>a</sup>, Pei-Ting Shen<sup>a</sup>, Jang-Yang Chang<sup>d, e</sup>, Teng-Kuang Yeh<sup>a</sup>, Chih-Hsiang Huang<sup>a</sup>, Hsih-Huei Chang<sup>a</sup>, Shu-Ying Cheng<sup>a</sup>, Chin-Yu Lin<sup>a</sup>, Chuan Shih<sup>a</sup>, Chiung-Tong Chen<sup>a</sup>, Wei-Min Liu<sup>b, f</sup>, Ching-Hui Chen<sup>b, f</sup>, Ching-Chuan Kuo<sup>a, e, g, \*</sup>

<sup>a</sup> Institute of Biotechnology and Pharmaceutical Research, National Health Research Institutes, Zhunan, Taiwan

<sup>b</sup> Department of Obstetrics and Gynecology, Taipei Medical University Hospital, Taipei, Taiwan

<sup>c</sup> Department of Pharmacy, Tajen University, Pingtung, Taiwan

<sup>d</sup> National Institute of Cancer Research, National Health Research Institutes, Tainan, Taiwan

<sup>e</sup> Institute of Clinical Pharmacy and Pharmaceutical Sciences, National Cheng Kung University Medical College, Tainan, Taiwan

<sup>f</sup> Department of Obstetrics and Gynecology, School of Medicine, College of Medicine, Taipei Medical University, Taipei, Taiwan

<sup>g</sup> Graduate Program for Aging, China Medical University, Taichung, Taiwan

**Corresponding author:**

Ching-Chuan Kuo, Ph.D., Institute of Biotechnology and Pharmaceutical Research, National Health Research Institutes, No. 35, Keyan Road, Zhunan 35053, Taiwan. Phone: +886-37-246166 ext. 35758; Fax: +886-37-586456; E-mail: [cckuo@nhri.org.tw](mailto:cckuo@nhri.org.tw)

## Table of Contents Graphic

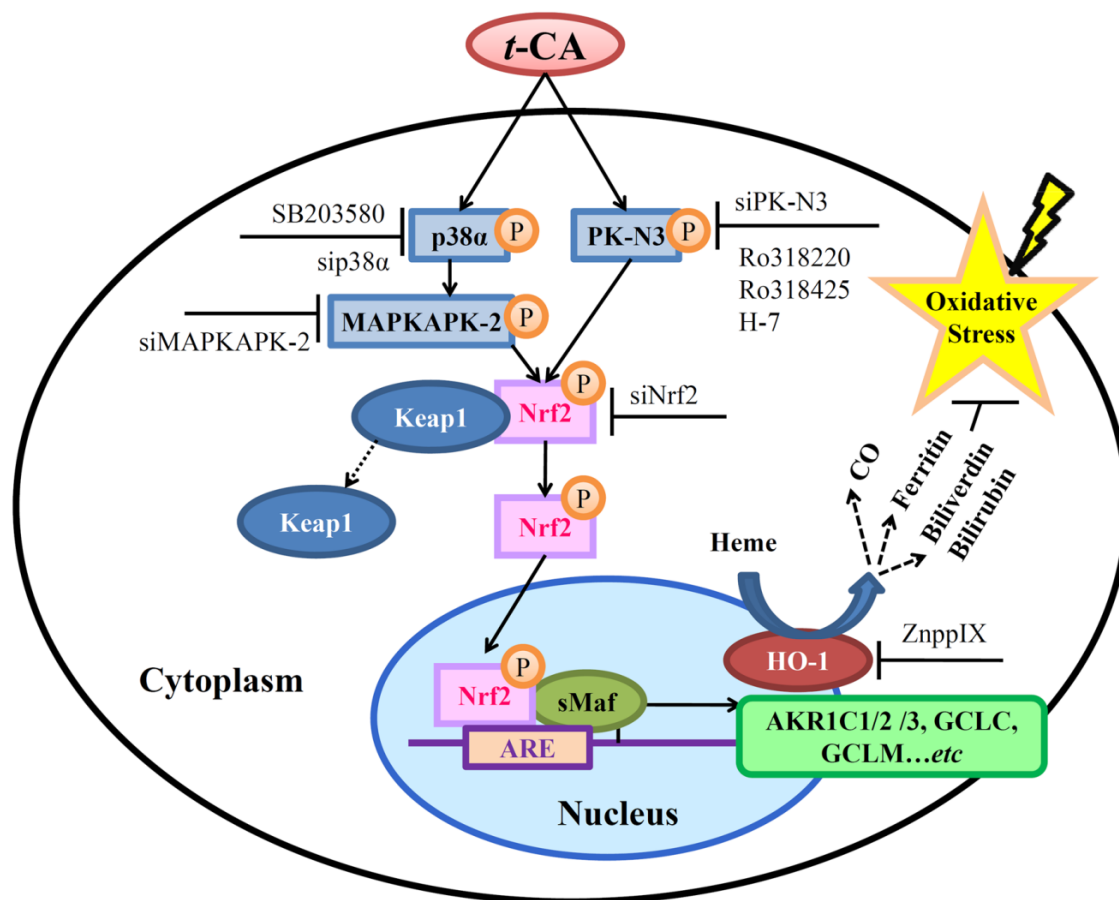

**Table S1. Primers used for real-time RT-PCR**

| <b>Primers</b> | <b>Sequences</b>                                                          |
|----------------|---------------------------------------------------------------------------|
| GR             | forward: 5' CACGGAGGAGCTGGAGAAC,<br>reverse: 5' CGACAAAGTCTTTTAAACCTCCTT; |
| TR             | forward: 5' CAGACGGGGAGGCTTTTC,<br>reverse: 5' CCGAGAGCGTTCCTTTCA;        |
| Prx-1          | forward: 5' CACTGACAAACATGGGGAAGT,<br>reverse: 5' TTTGCTCTTTTGGACATCAGG;  |
| GCLM           | forward: 5' GACAAAACACAGTTGGAACAGC,<br>reverse: 5' CAGTCAAATCTGGTGGCATC;  |
| GCLC           | forward: 5' ATGCCATGGGATTTGGAAT,<br>reverse: 5' AGATATACTGCAGGCTTGGGAATG; |
| HO-1           | forward: 5' TTCAGAAGGGCCAGGTGA,<br>reverse: 5' CCTCCAGGGCCACATAGAT;       |
| NQO-1          | forward: 5' ATGTATGACAAAGGACCCTTCC,<br>reverse: 5' TCCCTTGCAGAGAGTACATGG; |
| AKR1C1         | forward: 5' CATGCCTGTCCTGGGATTT,<br>reverse: 5' AGAATCAATATGGCGGAAGC;     |
| AKR1C2         | forward: 5' GCAGCGCATCAGACAGAAC,<br>reverse: 5' CAAGGGTCAAATATCGCACA;     |
| AKR1C3         | forward: 5' CATTGGGGTGTCAAACCTTCA,<br>reverse: 5' CCGGTTGAAATACGGATGAC;   |
| ABCC1          | forward: 5' TGTGGGAAAACACATCTTTGA,<br>reverse: 5' CTGTGCGTGACCAAGATCC;    |
| ABCC2          | forward, 5' AGCATGCTTCCCATGATGA,<br>reverse, 5' TCTAGCCGCTCTGTGGAAAC;     |
| ABCC3          | forward, 5' TGCTCTCCTTCATCAATCCA,<br>reverse, 5' TGGGGTTGGAGATAAACCTG;    |
| ABCC4          | forward, 5' AAGCGCCTGGGATCTACAA,<br>reverse, 5' CCCCTGGAGAGAAGATGACA;     |
| ABCC5          | forward, 5' CATCCACGCCTACAATAAAGG,<br>reverse, 5' GCATCGCACACGTAAACAAA;   |
| GAPDH          | forward: 5' AGCCACATCGCTCAGACAC,<br>reverse: 5' GCCCAATACGACCAAATCC       |

**Table S2. Target sequences of siRNA**

| Target name       | NCBI accession number | Target sequences                                                          |
|-------------------|-----------------------|---------------------------------------------------------------------------|
| AKT-1             | NM006164              | sense: AUACCGGCAAAGAAGCGAUGCUGCA;<br>antisense: UGCAGCAUCGCUUCUUUGCCGGUAU |
| p38 $\alpha$ MAPK | NM001315              | sense: GCUGUUGACUGGAAGAACAUGUUU;<br>antisense: AAACAAUGUUCUCCAGUCAACAGC   |
| p38 $\beta$ MAPK  | NM002751              | sense: UCAACGCUCUCAUCAUAUGGCUCGG;<br>antisense: CCGAGCCAUAUGAUGAGAGCGUUGA |
| MSK-1             | NM004755              | sense: UCCUUUGUUGCUCUCCAUCCUAU;<br>antisense: AUAGGAUGGAAGGAGCAACAAAGGA   |
| MAPKAPK-2         | NM004759              | sense: CCACUCCUUGUUAUACACCGUACUA;<br>antisense: UAGUACGGUGUAUAACAAGGAGUGG |
| PKC $\delta$      | NM006254              | sense: UGUCGAUGCAUUUCUUGUGGAUGGC;<br>antisense: GCCAUCCACAAGAAUGCAUCGACA  |
| PKC $\epsilon$    | NM005400              | sense: UCACAUACACUCUCCUUCUGGCUC;<br>antisense: GAGCCAGAAGGAAGAGUGUAUGUGA  |
| PKC $\theta$      | NM006257              | sense: UAUCCACCUCAUCCAACGGAGACUC;<br>antisense: GAGUCUCCGUUGGAUGAGGUGGAUA |
| PKC $\eta$        | NM006255              | sense: UUACACUGAAGUCCUUGUCGCAUUA;<br>antisense: UAAUGCGACAAGGACUUCAGUGUAA |
| PKC $\iota$       | NM002740              | sense: AAAUCUGGCAUGUUCUUCAGGAAGU;<br>antisense: ACUCCUGAAGAACAUGCCAGAUUU  |
| PKC $\zeta$       | NM002744              | sense: AUCGAUAACUGGCUUAAGGUCCUCC;<br>antisense: GGAGGACCUUAAGCCAGUUAUCGAU |
| PK-N1             | NM213560              | sense: AAUCCUCUCAAUGACAGGGUUGCGG;<br>antisense: CCGCAACCCUGUCAUUGAGAGGAUU |
| PK-N2             | NM006256              | sense: UUGGCAGCCCAUAAGACGAACUCC;<br>antisense: GGAAGUUCGUCUUAUGGGCUGCCAA  |
| PK-N3             | NM013355              | sense: UUGGGCAGGAAAUUACUGGGAGUGG;<br>antisense: CCACUCCAGUAAUUUCCUGCCCAA  |

**Table S3. Effect of *t*-CA on intracellular GSH and GSSG amount in HSC-3 cells**

| <i>t</i> -CA (μM) | GSH (μM/μg)  | GSSG (μM/μg) | GSH/GSSG ratio |
|-------------------|--------------|--------------|----------------|
| 0                 | 10.43 ± 0.67 | 1.2 ± 0.06   | 8.69           |
| 6.25              | 10.07 ± 0.65 | 1.22 ± 0.04  | 8.25           |
| 12.5              | 13.14 ± 2.33 | 1.32 ± 0.04  | 9.95           |
| 25                | 14.74 ± 1.18 | 1.38 ± 0.04  | 10.68          |
| 50                | 18.21 ± 0.25 | 1.43 ± 0.02  | 12.73          |

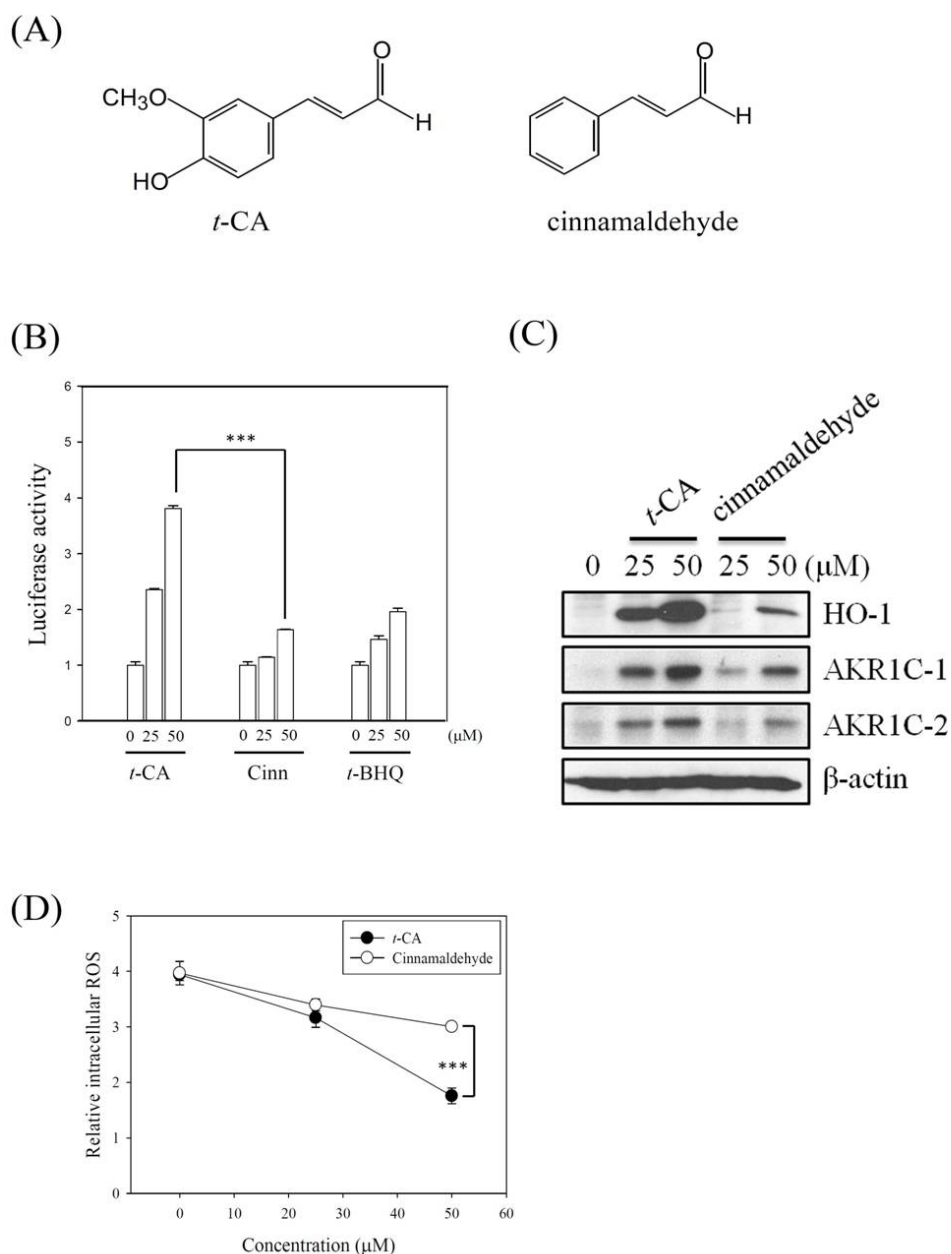

**Figure S1. Comparison of the effects of *t*-CA and cinnamaldehyde on the Nrf2/ARE-dependent gene induction and cytoprotective activity.** (A) Chemical structure of *t*-CA and cinnamaldehyde. (B) HSC3-ARE9 cells were treated with 25 and 50 μM of *t*-BHQ, *t*-CA and cinnamaldehyde (Cinn) for 24 h and luciferase activity was analyzed as described in Materials and Methods. (C) HSC-3 cells were treated with 25 and 50 μM of *t*-CA and cinnamaldehyde for 24 h and then the protein levels of HO-1, AKR1C1, and AKR1C2 were detected using immunoblotting. β-actin was used as an internal control. (D) HSC-3 cells were pre-incubated with indicated concentrations of *t*-CA and cinnamaldehyde for 24 h and then exposed to 200 μM *t*-BHP for an additional 4 h. The levels of intracellular ROS were measured using DCFH-DA fluorescence. Significantly different: \* $p < 0.05$  and \*\*\* $p < 0.005$ .
